# Supplementary material for: Clinical features and prognostic factors of Churg-Strauss syndrome
Source: PubMed Central journal article supplement — Korean J Intern Med. 2014 Jan 2;29(1):85–95. doi: 10.3904/kjim.2014.29.1.85 (PMC3932399; doi:10.3904/kjim.2014.29.1.85), 2014-01-02
Supplement: kjim-29-85-s001.pdf [file kjim-29-85-s001.pdf]

**Supplementary Table 1. Treatment response according to medical treatment**

|                         | Steroid only | Steroid and cyclosporine | Steroid and azathioprine | <i>p</i> value |
|-------------------------|--------------|--------------------------|--------------------------|----------------|
| Poor responder (n = 9)  | 7            | 1                        | 1                        | 0.652          |
| Good responder (n = 34) | 24           | 8                        | 2                        |                |

Values are presented as numbers of patients. Pearson chi-square tests were used to calculate *p* values.
