# Supplementary material for: Clinical features and prognostic factors of Churg-Strauss syndrome
Source: PubMed Central journal article supplement — Korean J Intern Med. 2014 Jan 2;29(1):85–95. doi: 10.3904/kjim.2014.29.1.85 (PMC3932399; doi:10.3904/kjim.2014.29.1.85), 2014-01-02
Supplement: kjim-29-85-s002.pdf [file kjim-29-85-s002.pdf]

**Supplementary Table 2. Steroid use according to medical treatment**

|                                         | Steroid              | Steroid and cyclosporine | Steroid and azathioprine | <i>p</i> value |
|-----------------------------------------|----------------------|--------------------------|--------------------------|----------------|
| Steroid loading dose Pd, mg/kg          | 0.91<br>(0.25–17.66) | 1.05<br>(0.33–4.48)      | 0.7945<br>(0.50–1.09)    | 0.900          |
| Steroid maintenance dose Pd, mg/kg      | 0.15<br>(0.04–0.84)  | 0.09<br>(0.07–0.17)      | 0.11<br>(0.09–0.13)      | 0.433          |
| Duration of steroid administration, day | 1,929<br>(33–6,228)  | 952<br>(212–4,858)       | 4,389<br>(2,052–6,726)   | 0.272          |

Values are presented as median with range (minimum-maximum). Analysis of variance was used to calculate *p* values. Pd, prednisolone.
